# Supplementary material for: Surgical informed consent practices and influencing factors in sub-Saharan Africa: a scoping review of the literature
Source: HighWire-hosted journal article supplement (doi:10.1136/bmjqs-2023-016823), 2023-12-30
Supplement: bmjqs-2023-016823supp003_data_supplement.pdf [file bmjqs-2023-016823supp003_data_supplement.pdf]

## Supplementary Material 3: Key Characteristics of Included Studies

Supplementary Table 3.1. Key characteristics of included studies

| Author           | Year | Country  | Perspective                 | Design                                  | Population                                                                              | Surgery area             | Setting                                                    | Aim                                                                                                                                                                                                                          | Main message                                                                                                                                                                                                                   |
|------------------|------|----------|-----------------------------|-----------------------------------------|-----------------------------------------------------------------------------------------|--------------------------|------------------------------------------------------------|------------------------------------------------------------------------------------------------------------------------------------------------------------------------------------------------------------------------------|--------------------------------------------------------------------------------------------------------------------------------------------------------------------------------------------------------------------------------|
| Ababulgu et al.  | 2022 | Ethiopia | Patients                    | Descriptive - survey and health records | 288 adult women who underwent CS (median age 28 yrs range 18-45)                        | Obstetrics & Gynaecology | 1 tertiary hospital                                        | To assess the quality of informed consent in caesarean section                                                                                                                                                               | Women who undergo caesarean section receive inadequate informed consent                                                                                                                                                        |
| Ankeambom et al. | 2022 | Cameroon | Both patients and providers | Descriptive - cross sectional survey    | 70 adult patients (mean age 41 yrs; 74% male) and 20 healthcare providers (no age info) | Neurosurgery             | 2 centres (level one and two according to national system) | To assess ethical dimensions of informed consent for neurosurgery in Cameroon and their relationship with patient satisfaction and outcomes                                                                                  | The majority of patients were pleased with their involvement in the decision-making process and felt their autonomy was respected, but they had poor comprehension and recall of information conveyed to them by neurosurgeons |
| Aremu et al.     | 2011 | Nigeria  | Patients                    | Intervention study - RCT                | 50 adult patients (average age 43 yrs, range 16-76; 60% male)                           | Otorhinolaryngology      | 1 teaching hospital                                        | To evaluate how much patients remember of the risks discussed with them regarding their otorhinolaryngologic surgeries and whether a simple intervention, the addition of an information handout, could improve their recall | Written handouts can improve patient comprehension (e.g. risks and potential complications from surgery)                                                                                                                       |
| Ayele et al.     | 2022 | Ethiopia | Patients                    | Descriptive - cross sectional survey    | 404 elective surgery adult patients (mean age 40 yrs , SD 15; 40% male)                 | Multiple                 | 3 hospitals                                                | To assess patients' satisfaction and associated factors of informed consent process among elective surgical patients                                                                                                         | Patient satisfaction with the surgical informed consent process is relatively low                                                                                                                                              |

|                |      |          |                     |                                      |                                                                                                 |                          |                          |                                                                                                                                            |                                                                                                                                                                                                                                                                          |
|----------------|------|----------|---------------------|--------------------------------------|-------------------------------------------------------------------------------------------------|--------------------------|--------------------------|--------------------------------------------------------------------------------------------------------------------------------------------|--------------------------------------------------------------------------------------------------------------------------------------------------------------------------------------------------------------------------------------------------------------------------|
| Bakker et al.  | 2021 | Malawi   | Providers practices | Qualitative                          | 22 clinical officers, nurses-midwives, midwifery students (median age 30 yrs; 59% male)         | Obstetrics & Gynaecology | 1 rural mission hospital | To explore health workers' beliefs and experiences related to principles and practices of informed consent for caesarean section           | Health workers are familiar with the principles around informed consent and aware of its advantages, but fear of blame and litigation, partial disclosure of risks and barriers to communication hamper the process of obtaining informed consent                        |
| Biyazin et al. | 2021 | Ethiopia | Patients            | Descriptive - cross sectional survey | 372 adult women (mean age 29.5 yrs, SD 3.5)                                                     | Obstetrics & Gynaecology | 1 teaching hospital      | To assess the mode of decision-making approach in surgical procedures among women who have undergone obstetrics and gynaecologic surgeries | Paternalistic mode of decision-making, where patients rely on the opinion of health providers, is still in practice in Ethiopia. Good patient-health care providers' relationships is vital for facilitating clients reaching decisions on their own                     |
| Biyazin et al. | 2022 | Ethiopia | Patients            | Descriptive - cross sectional survey | 372 adult women (mean age 29.5 yrs, SD 3.5)                                                     | Obstetrics & Gynaecology | 1 tertiary hospital      | To assess the health care provider-patient relationship during preoperative care in obstetric and gynaecologic surgeries                   | More than half of the respondents did not have good patient-health care provider relationship                                                                                                                                                                            |
| Biyazin et al. | 2022 | Ethiopia | Patients            | Descriptive - cross sectional survey | 372 adult women (mean age 29.5 yrs, SD 3.5)                                                     | Obstetrics & Gynaecology | 1 tertiary hospital      | To assess patient satisfaction with surgical informed consent                                                                              | Patients' satisfaction with the surgical informed consent process was relatively low. Aspects of the process that scored particularly low were: the information received on an indication of operation; patients' chance to express their opinions and to ask questions. |
| Chane et al.   | 2020 | Ethiopia | Patients            | Descriptive - cross sectional survey | 135 major surgery adult patients (evenly distributed among age groups from 18 to 60+; 49% male) | Surgery - not specified  | 1 tertiary hospital      | To assess the quality of informed consent among patients who underwent major surgery                                                       | The quality of informed consent is poor in the surgical ward                                                                                                                                                                                                             |

|                       |      |                    |               |                                      |                                                                                                                                                                              |                          |                                                 |                                                                                                                                     |                                                                                                                                                                                                                                                                                                                                                                                                                                                                                                                             |
|-----------------------|------|--------------------|---------------|--------------------------------------|------------------------------------------------------------------------------------------------------------------------------------------------------------------------------|--------------------------|-------------------------------------------------|-------------------------------------------------------------------------------------------------------------------------------------|-----------------------------------------------------------------------------------------------------------------------------------------------------------------------------------------------------------------------------------------------------------------------------------------------------------------------------------------------------------------------------------------------------------------------------------------------------------------------------------------------------------------------------|
| Enabudoso & Igbarumah | 2012 | Nigeria            | Patients      | Descriptive - cross sectional survey | 197 adult women who underwent CS (mean age 31 yrs, SD 5)                                                                                                                     | Obstetrics & Gynaecology | 1 teaching hospital                             | To examine the level of patient autonomy using maternal preference to sign the consent for caesarean section as the assessment tool | Increasing maternal age and having a tertiary education were shown to be associated with increasing autonomy (signing consent for caesarean section)                                                                                                                                                                                                                                                                                                                                                                        |
| Ezeome et al.         | 2011 | Nigeria            | Consent forms | Descriptive - quantitative           | 33 consent forms                                                                                                                                                             | Surgery in general       | 49 federal tertiary health institutions         | To evaluate the content and textual readability of surgical consent forms used in public tertiary institutions in Nigeria           | The content of majority of the informed consent forms used in Nigerian tertiary health institutions are poor and they are written in too technical, a language for most patients to understand                                                                                                                                                                                                                                                                                                                              |
| Friedland et al.      | 2011 | Zambia & Swaziland | Patients      | Mixed-Method                         | 228 male circumcision clients in Zambia (of which 159 adults and 69 adolescents aged 13-17 yrs) & 953 MC clients in Swaziland (756 adults and 69 adolescents aged 13-17 yrs) | VMMC                     | 23 clinics providing male circumcision services | To assess comprehension of concepts of informed consent among adult and adolescent clients undergoing male circumcision             | Although a majority of participants were able to pass the comprehension test, several important concepts were not well understood, and there were notable differences in comprehension between adults and adolescents. Risk communication may be particularly difficult in the context of MC, because the term "risk" is used (in English and in local languages) to outline potential negative consequences of the MC surgical procedure while simultaneously describing the primary benefit of MC (reduced "risk" of HIV) |
| Gebrehiwot et al.     | 2022 | Ethiopia           | Patients      | Descriptive - cross sectional survey | 422 adult patients (majority ranged 18-30 yrs, 62% female)                                                                                                                   | Multiple                 | 1 specialised and 1 general public hospital     | To assess patients' perception of informed consent and its associated factors among surgical patients attending public hospitals    | One-third of surgical patients had a poor perception of informed consent for surgical procedures                                                                                                                                                                                                                                                                                                                                                                                                                            |

|               |      |          |           |                                      |                                                                                                                      |                          |                                                   |                                                                                                                                                            |                                                                                                                                                                                                                                                                                     |
|---------------|------|----------|-----------|--------------------------------------|----------------------------------------------------------------------------------------------------------------------|--------------------------|---------------------------------------------------|------------------------------------------------------------------------------------------------------------------------------------------------------------|-------------------------------------------------------------------------------------------------------------------------------------------------------------------------------------------------------------------------------------------------------------------------------------|
| Grema et al.  | 2022 | Nigeria  | Patients  | Descriptive - cross sectional survey | 244 elective adult patients (mean age 34.8, yrs SD 14.3; 62% female)                                                 | Multiple                 | 1 tertiary hospital                               | To assess the surgical patients' experience of informed consent                                                                                            | There are deficiencies in the process of obtaining consent (e.g. 38.5% and 48.8% of patients did not receive information about surgical procedures' immediate and long-term complications, respectively). However, most patients are satisfied with the process of securing consent |
| Kebede et al. | 2023 | Ethiopia | Patients  | Descriptive - cross sectional survey | 372 adult women (median age 28% yrs)                                                                                 | Obstetrics & Gynaecology | 1 tertiary hospital                               | To assess the knowledge of surgical informed consent and associated factors among patients who underwent obstetric and gynaecologic surgery                | Knowledge of patients towards surgical informed consent for their obstetric and gynaecologic surgical procedures was significantly low                                                                                                                                              |
| Moyer et al.  | 2022 | Eswatini | Patients  | Qualitative                          | 48 male adolescents (between 10-19 yrs)                                                                              | VMMC                     | 1 clinic providing VMMC services                  | To examine the social complexities of informed consent and assent among young males undergoing voluntary medical male circumcision                         | Respect for young males' rights and decision-making in the VMMC consent process is limited by complex social, economic and political realities                                                                                                                                      |
| Negash et al. | 2021 | Ethiopia | Providers | Descriptive - cross sectional survey | 621 nurses, midwives, physicians, anaesthetists and emergency surgery officers (median age 29 yrs, SD 5.7; 59% male) | Surgery - not specified  | 5 public hospitals (referral and district levels) | To assess practice and factors associated with the informed consenting process for major surgical procedures among health-care workers in public hospitals | Only half of health-care workers practiced good informed consent                                                                                                                                                                                                                    |

|                 |      |         |          |                                      |                                                                           |          |                     |                                                                                                         |                                                                                                                                                                                                                                                                                                                                                                                                                                                                            |
|-----------------|------|---------|----------|--------------------------------------|---------------------------------------------------------------------------|----------|---------------------|---------------------------------------------------------------------------------------------------------|----------------------------------------------------------------------------------------------------------------------------------------------------------------------------------------------------------------------------------------------------------------------------------------------------------------------------------------------------------------------------------------------------------------------------------------------------------------------------|
| Nnabugwu et al. | 2020 | Nigeria | Patients | Descriptive - surveys                | 95 men (mean age 68.6 yrs, SD 6.2) scheduled for elective prostate biopsy | Urology  | 1 tertiary hospital | To evaluate the role of a third party check on patient's recall of consent information                  | Recall of consent information on nature of disease condition, the nature of the planned procedure, and the risks involved in the planned procedure are significantly higher among patients that positively attested to a third-party that the consent processes satisfactorily addressed all their concerns. Use of "third-party checks" could be useful in low-literacy setting, and may encourage patients feeling "freer" to exercise their autonomy in decision-making |
| Nnabugwu et al. | 2017 | Nigeria | Patients | Descriptive - cross sectional survey | 369 elective patients (mean age 44.1 yrs, SD 17.7; 53% male)              | Multiple | 1 teaching hospital | To evaluate the relationship between satisfying consent and the extent of recall of consent information | Appropriate recall of consent information as an index of understanding by the patients is better among patients whose concerns relating to the disease conditions and treatment decisions are satisfactorily addressed than those whose concerns are not                                                                                                                                                                                                                   |

|                       |      |         |           |                                      |                                                                                                                                                                   |          |                                                              |                                                                                                   |                                                                                                                                                                                                                                                                                                                                                                                                                                                                                          |
|-----------------------|------|---------|-----------|--------------------------------------|-------------------------------------------------------------------------------------------------------------------------------------------------------------------|----------|--------------------------------------------------------------|---------------------------------------------------------------------------------------------------|------------------------------------------------------------------------------------------------------------------------------------------------------------------------------------------------------------------------------------------------------------------------------------------------------------------------------------------------------------------------------------------------------------------------------------------------------------------------------------------|
| Ochieng et al.        | 2014 | Uganda  | Providers | Mixed-Method                         | 132 intern doctors, residents and specialists participated in the survey (mean age 33.1 yrs, SD 8.4; 80.5% male) + 20 interviews with doctors + 384 patient files | Multiple | 3 university teaching hospitals                              | To evaluate informed consent practices of surgeons in teaching hospitals                          | No significant differences in obtaining informed consent among doctors among the different specialties, levels of education or experience. Yet, informed consent administration and documentation for surgical care is still inadequate at University teaching hospitals in Uganda. There is need for development of an informed consent template with adequate information and room for modification to facilitate the informed consent process and accompanying training for surgeons. |
| Ochieng et al.        | 2015 | Uganda  | Patients  | Descriptive - cross sectional survey | 371 adult patients (mean age 32 yrs, SD 12.3; 51% female)                                                                                                         | Multiple | 3 university teaching hospitals                              | To evaluate patients experiences and perspectives of informed consent process following surgery   | Patients' perceptions of what constitutes informed consent are diverse and many undergo surgery without full understanding. Patients' age, sex (male) and having all questions answered prior to the operation are significantly associated with the likelihood of patients giving their own permission for the operation                                                                                                                                                                |
| Ogundiran & Adebamowo | 2010 | Nigeria | Providers | Descriptive - cross sectional survey | 102 consultants & surgical trainees (58.8% were aged 31–40 yrs; 85% male)                                                                                         | Multiple | Hospitals in major cities and towns in South-western Nigeria | To examine opinions and practices of surgeons in Nigeria about informed consent in their practice | Most Nigerian surgeons whose opinions were sampled demonstrated a good knowledge of the informed consent requirements and process but fall short in practice. There is a need to improve the surgeon–patient relationship                                                                                                                                                                                                                                                                |

|                |      |         |           |                                      |                                                                                                                                                                             |                          |                                                            |                                                                                                                                                |                                                                                                                                                                                                                                                                                                                                                                                 |
|----------------|------|---------|-----------|--------------------------------------|-----------------------------------------------------------------------------------------------------------------------------------------------------------------------------|--------------------------|------------------------------------------------------------|------------------------------------------------------------------------------------------------------------------------------------------------|---------------------------------------------------------------------------------------------------------------------------------------------------------------------------------------------------------------------------------------------------------------------------------------------------------------------------------------------------------------------------------|
| Okonta         | 2015 | Nigeria | Providers | Descriptive - cross sectional survey | 135 trainee OBGYN residents at the 2013 revision course (77.6% aged 30-39 yrs)                                                                                              | Obstetrics & Gynaecology | National Postgraduate Medical College of Nigeria           | To investigate obstetrics and gynaecology residents' knowledge of the informed consent process and its practice in their training institutions | Residents in obstetrics and gynaecology in Nigeria have some, but not sufficient, knowledge of the informed consent process. There is a need to teach residents the rudiments of informed consent and bioethics in general.                                                                                                                                                     |
| Olatosi et al. | 2016 | Nigeria | Providers | Descriptive - cross sectional survey | 56 physician anaesthetists attending a continuous medical education programme (38% in age group 31-40 yrs, 34% in age group 41-50 yrs, 2% in age group 21-30 yrs; 75% male) | Surgery & Anaesthesia    | Nigerian Annual Scientific Meeting for Anaesthetists, 2015 | To determine the attitudes and practices of informed consent among anaesthetists in Nigeria                                                    | Informed consent is believed to improve the doctor-patient relationship, to be important to respect the patient's autonomy and provided the surgeons and anaesthetists with protection against medical litigation. It is paramount to disclose all major risks, however patient's age, level of education and inquisitiveness may influence the amount of information disclosed |

|                |      |                    |          |                                      |                                                                                                                                                                                                                                                                                                               |                          |                                    |                                                                                                                                                |                                                                                                                                                                                                                                      |
|----------------|------|--------------------|----------|--------------------------------------|---------------------------------------------------------------------------------------------------------------------------------------------------------------------------------------------------------------------------------------------------------------------------------------------------------------|--------------------------|------------------------------------|------------------------------------------------------------------------------------------------------------------------------------------------|--------------------------------------------------------------------------------------------------------------------------------------------------------------------------------------------------------------------------------------|
| Schenk et al.  | 2014 | Zambia & Swaziland | Patients | Qualitative                          | In Zambia 34 adults (mean age 26.2 yrs, range 18-43 yrs) and 28 adolescent (mean age 15.7 yrs, range 13-17 yrs) male circumcision clients, and 13 key informants (85% male). In Swaziland: 16 adult (mean age 23.6, range 21-32) and 14 adolescent (mean age 15.1 yrs, range 13-17) male circumcision clients | VMMC                     | 11 clinics providing VMMC services | To assess clients' understanding and experience of the informed consent process for voluntary medical male circumcision                        | Informed consent is not well understood in poorly educated communities. It is imperative that the fidelity to a high-quality informed consent process is not lost in the rush to implement circumcision services on a national scale |
| Teshome et al. | 2018 | Ethiopia           | Patients | Descriptive - cross sectional survey | 230 adult women (40% aged 25-29 yrs)                                                                                                                                                                                                                                                                          | Obstetrics & Gynaecology | 1 tertiary hospital                | To assess the comprehensiveness of the surgical informed process for women undergoing obstetric and gynaecological surgeries                   | There is gap in the provision of comprehensive and standardised pre-operative counselling for obstetric and gynaecologic surgeries in the study hospital                                                                             |
| Teshome et al. | 2019 | Ethiopia           | Patients | Intervention study - pre/post        | 457 adult women (majority aged 25-34 yrs)                                                                                                                                                                                                                                                                     | Obstetrics & Gynaecology | 1 tertiary hospital                | To assess whether an intervention designed to improve SIC in obstetric and gynaecologic surgeries is associated with receipt of SIC components | The institutionalisation of a standard SIC delivery approach is associated with receipt of a higher number of standard counselling components. However, the improvement may not endure without sustained intervention                |



Supplementary Table 3.2. Relevant data related to the review questions

| Author                | Year | SIC practices                      |              |        |                                  |                              |                         | Individual level influencing factors       |                                      |                         | Interpersonal level influencing factors |                                                                     |                  |                                  | Institutional level influencing factors |                                                   |                                           | System/societal level influencing factors |                                        | Implications            |                    |                        |
|-----------------------|------|------------------------------------|--------------|--------|----------------------------------|------------------------------|-------------------------|--------------------------------------------|--------------------------------------|-------------------------|-----------------------------------------|---------------------------------------------------------------------|------------------|----------------------------------|-----------------------------------------|---------------------------------------------------|-------------------------------------------|-------------------------------------------|----------------------------------------|-------------------------|--------------------|------------------------|
|                       |      | Is informed consent always sought? | Who does it? | Timing | Extent of information disclosure | Opportunity to ask questions | Overall adequacy of SIC | Patient's sociodemographic characteristics | Patient's literacy level / education | Patient's health status | Providers' understanding of consent     | Providers' attitude and behaviour, incl. relationship with patients | Ethical dilemmas | Influence of guardians and peers | Consent forms, protocols & regulations  | Language of care provision at the health facility | Health facilities' priorities and targets | Culture and social norms                  | National policies and donor programmes | Patient's comprehension | Patient's autonomy | Patients' satisfaction |
| Ababulgu et al.       | 2022 |                                    |              | x      | x                                | x                            | x                       | x                                          | x                                    | x                       |                                         |                                                                     |                  | x                                |                                         |                                                   | x                                         |                                           | x                                      | x                       |                    |                        |
| Ankeambom et al.      | 2022 |                                    |              |        | x                                |                              |                         |                                            |                                      | x                       |                                         |                                                                     | x                |                                  |                                         |                                                   |                                           |                                           | x                                      | x                       |                    |                        |
| Aremu et al.          | 2011 |                                    |              |        |                                  |                              |                         | x                                          |                                      |                         |                                         |                                                                     |                  | x                                |                                         |                                                   |                                           |                                           | x                                      |                         |                    |                        |
| Ayele et al.          | 2022 |                                    |              |        |                                  |                              |                         | x                                          | x                                    | x                       |                                         |                                                                     |                  |                                  |                                         |                                                   |                                           |                                           |                                        |                         | x                  |                        |
| Bakker et al.         | 2021 |                                    | x            |        |                                  |                              |                         | x                                          | x                                    | x                       | x                                       | x                                                                   | x                | x                                | x                                       |                                                   | x                                         | x                                         | x                                      | x                       |                    |                        |
| Biyazin et al.        | 2021 |                                    | x            | x      |                                  |                              | x                       |                                            |                                      |                         |                                         |                                                                     |                  |                                  |                                         |                                                   | x                                         |                                           |                                        | x                       |                    |                        |
| Biyazin et al.        | 2022 |                                    | x            | x      |                                  |                              |                         | x                                          |                                      |                         |                                         |                                                                     |                  | x                                |                                         |                                                   |                                           |                                           |                                        | x                       | x                  |                        |
| Biyazin et al.        | 2022 |                                    | x            | x      | x                                |                              |                         | x                                          | x                                    | x                       |                                         |                                                                     |                  |                                  | x                                       |                                                   |                                           |                                           | x                                      |                         | x                  |                        |
| Chane et al.          | 2020 |                                    | x            | x      | x                                | x                            | x                       |                                            |                                      |                         |                                         |                                                                     |                  | x                                |                                         |                                                   |                                           |                                           |                                        |                         | x                  |                        |
| Enabudoso & Igbarumah | 2012 |                                    |              |        |                                  |                              |                         | x                                          | x                                    |                         |                                         |                                                                     | x                |                                  |                                         |                                                   | x                                         |                                           |                                        | x                       |                    |                        |

|                       |      |   |   |   |   |   |   |   |   |   |   |  |   |   |   |   |  |   |   |   |   |   |
|-----------------------|------|---|---|---|---|---|---|---|---|---|---|--|---|---|---|---|--|---|---|---|---|---|
| Ezeome et al.         | 2011 |   |   |   | x |   |   |   |   |   |   |  |   | x |   |   |  | x | x |   |   |   |
| Friedland et al.      | 2011 |   |   |   | x |   |   | x |   |   |   |  |   |   | x |   |  |   | x | x |   |   |
| Gebrehiwot et al.     | 2022 |   | x | x |   |   |   | x | x |   |   |  |   | x | x |   |  |   | x |   | x |   |
| Grema et al           | 2022 |   | x | x | x | x | x | x |   |   |   |  |   |   |   |   |  |   | x |   | x |   |
| Kebede et al          | 2023 |   | x | x |   |   |   |   |   | x |   |  |   |   |   |   |  |   | x |   | x |   |
| Moyer et al           | 2022 |   | x | x | x | x | x |   |   | x |   |  |   | x | x | x |  | x | x | x | x |   |
| Negash et al          | 2021 | x |   |   |   |   |   |   |   | x | x |  |   |   | x |   |  |   |   |   |   |   |
| Nnabugwu et al        | 2020 |   | x | x | x |   |   | x | x |   |   |  |   |   |   |   |  |   | x | x | x |   |
| Nnabugwu et al.       | 2020 | x | x |   | x |   |   | x | x |   |   |  |   |   |   |   |  |   |   |   |   |   |
| Ochieng et al.        | 2014 | x | x | x |   |   |   |   |   |   |   |  |   |   | x |   |  |   |   |   |   |   |
| Ochieng et al.        | 2015 |   |   |   | x | x | x | x |   |   |   |  |   |   |   |   |  |   |   |   | x | x |
| Ogundiran & Adebamowo | 2010 |   |   |   | x |   |   |   |   |   |   |  | x | x |   | x |  |   |   |   |   |   |
| Okonta                | 2015 |   | x | x | x |   |   | x |   |   |   |  |   |   |   |   |  |   |   |   |   |   |
| Olatosi et al.        | 2016 | x |   |   | x |   |   |   |   |   |   |  |   |   |   |   |  |   |   |   | x |   |
| Schenk et al          | 2014 |   |   | x | x |   |   | x | x |   |   |  |   |   | x | x |  |   |   |   | x | x |
| Teshome et al.        | 2018 |   | x | x | x | x |   |   | x |   |   |  |   |   | x | x |  |   |   |   |   | x |
| Teshome et al.        | 2019 |   |   | x | x |   |   | x | x |   |   |  |   |   | x | x |  |   |   |   |   | x |
